# Supplementary material
Source: publisher figshare collection journal article supplement (https://frontiersin.figshare.com/ndownloader/files/31602716)
Supplement: Supplementary file [file 31602716]

# Figure S5

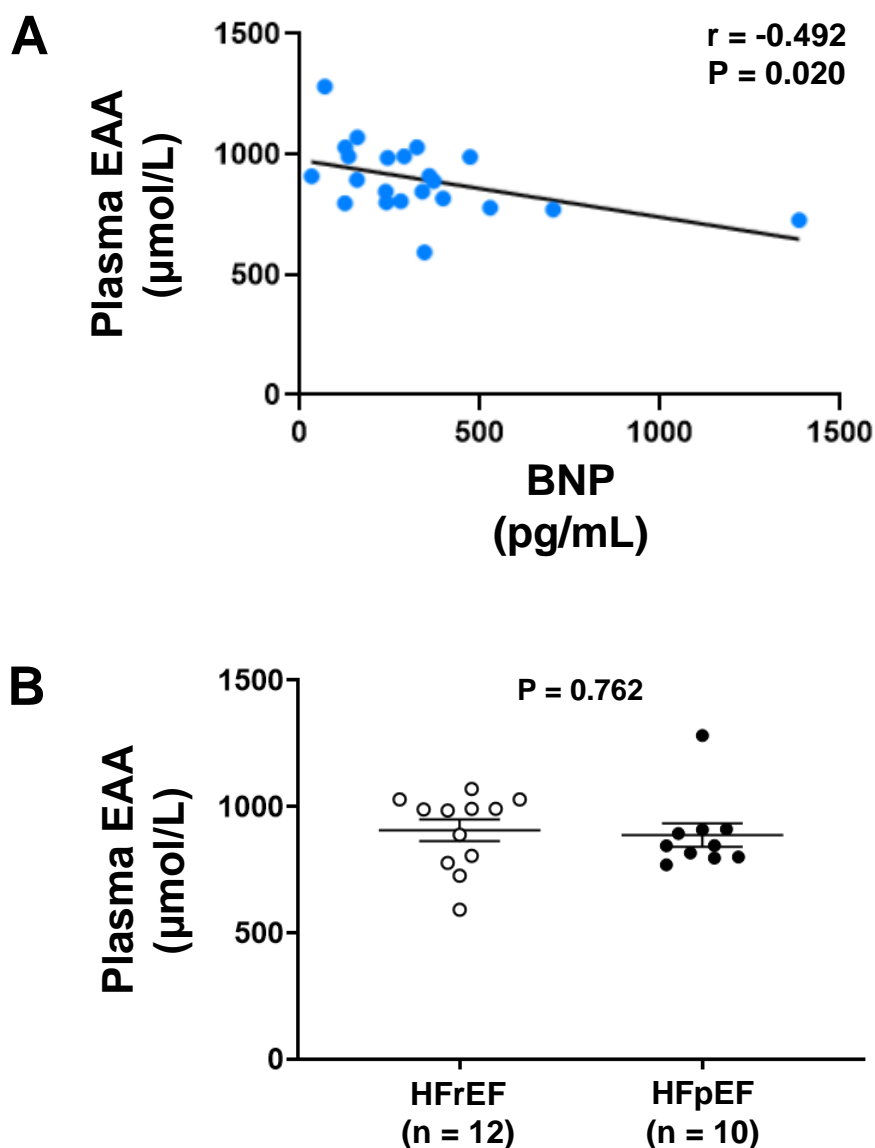

**Figure S5. Associations of plasma essential amino acid (EAA) levels with circulating B-type natriuretic peptide (BNP) levels or left ventricular ejection fraction (LVEF).**

(A) Relationship between circulating BNP and EAA levels in heart failure (HF) patients (n = 22). Spearman's correlation test was used for the analysis (B) Subgroup analysis of plasma EAA levels based on LVEF. HF with reduced ejection fraction (HFrEF) and preserved ejection fraction (HFpEF) were defined as LVEF  $\leq 40\%$  and  $\geq 50\%$ , respectively. The data are shown as the mean  $\pm$  SEM. Comparison was carried out using Student's t-test.
